# Supplementary material for: Security in Transformer Visual Trackers: A Case Study on the Adversarial Robustness of Two Models
Source: Preprints.org preprint supplement (doi:10.20944/preprints202405.1451.v1), 2024-05-22
Supplement: Supplementary file 6 [file supplementary]

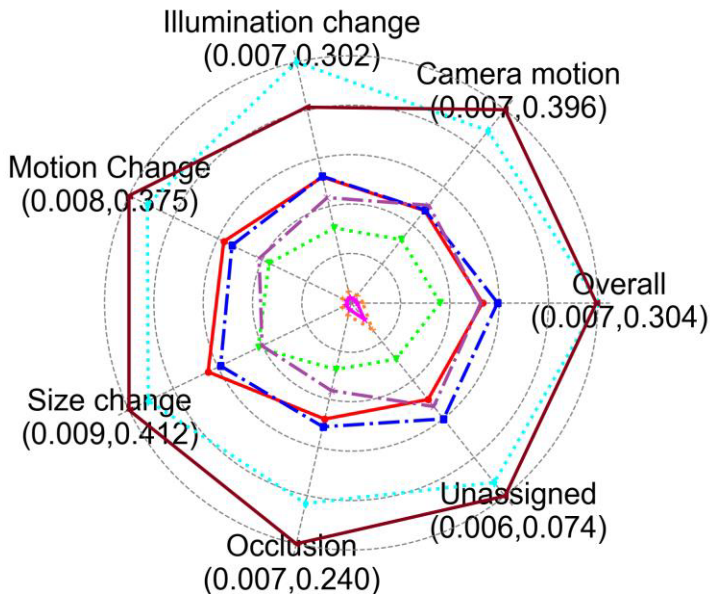

—●— MixFormer\_CSA

... MixFormer\_IoU

—■— MixFormer\_origin

—▲— MixFormer\_RTAA

... TransT\_CSA

—×— TransT\_IoU

—◀— TransT\_origin

... TransT\_RTAA
