# Supplementary figures and images for: Security in Transformer Visual Trackers: A Case Study on the Adversarial Robustness of Two Models
Source: Preprints.org preprint supplement (doi:10.20944/preprints202405.1451.v1), 2024-05-22

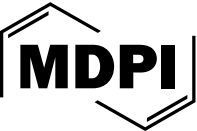

Supplement: Supplementary file 1 [file supplementary]

Success plots on GOT-10k

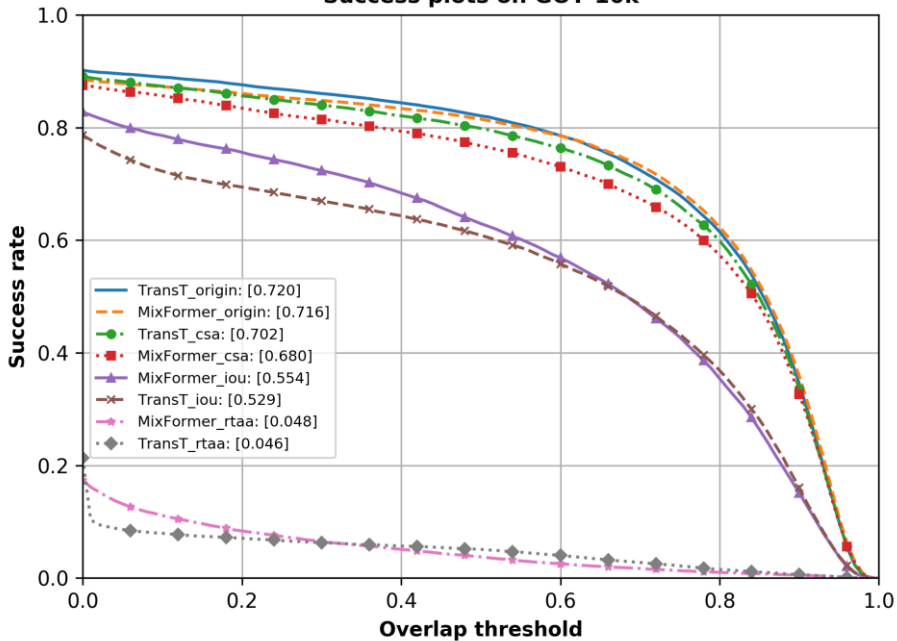

Supplement: Supplementary file 3 [file supplementary]

# MixFormer █ TransT

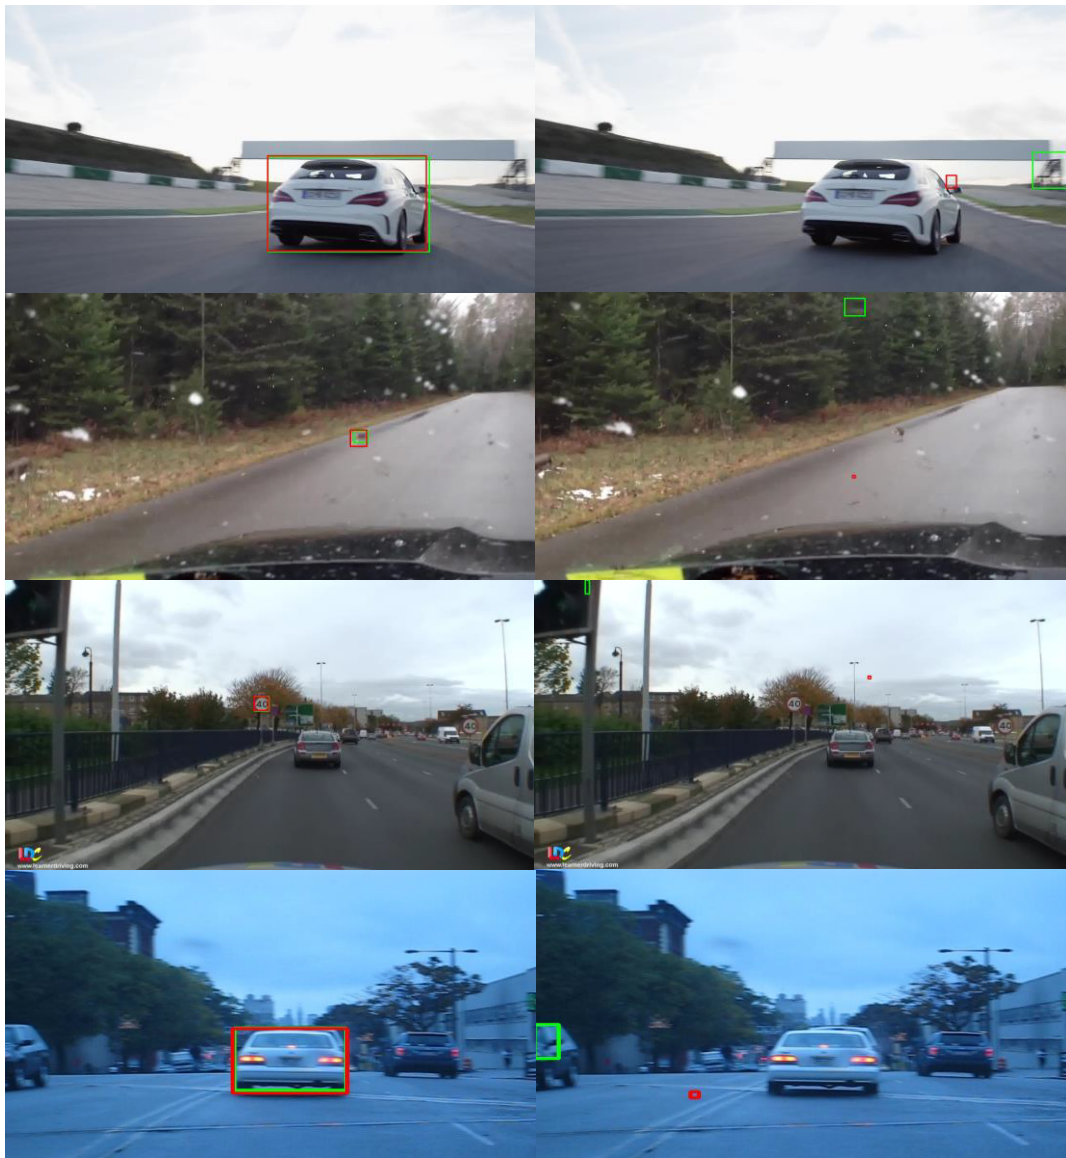

(a) Original Tracking Results    (b) Adversarial Attack Results

Supplement: Supplementary file 4 [file supplementary]

### Success plots of OPE

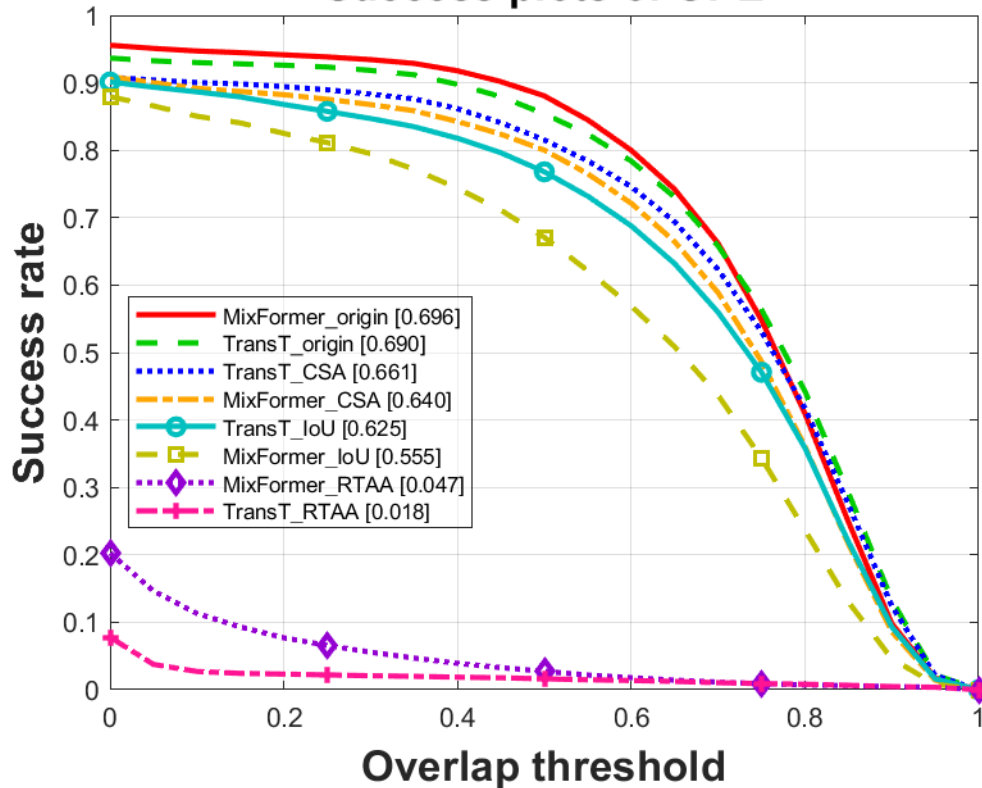

### Precision plots of OPE

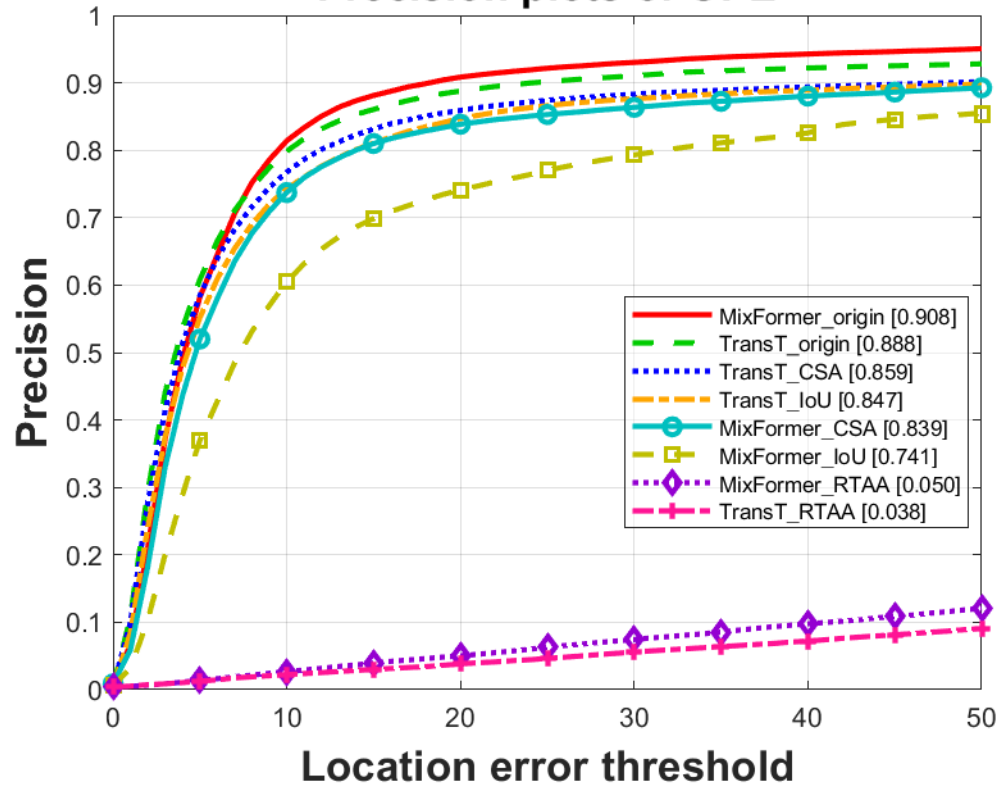

Supplement: Supplementary file 5 [file supplementary]
